# Supplementary material
Source: PubMed Central journal article supplement (PMC8088389)

Figure S1

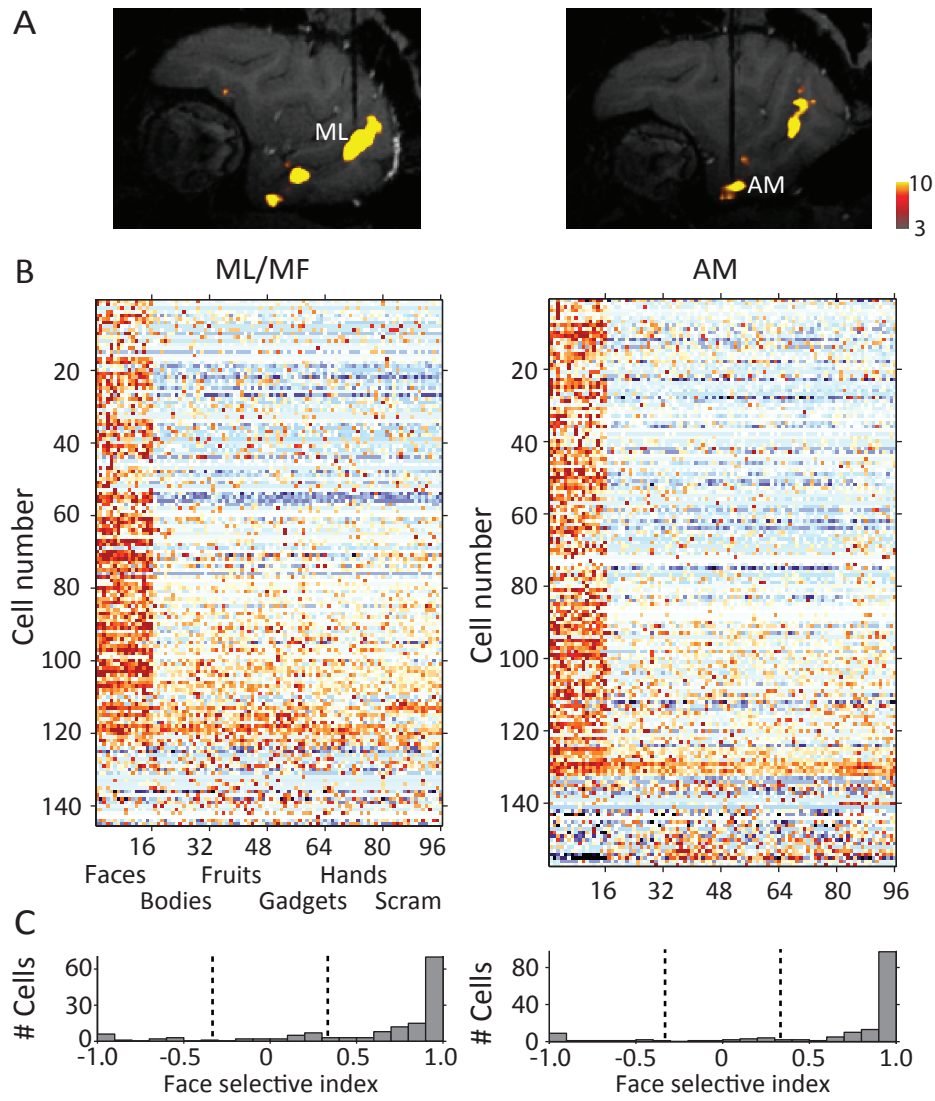

Supplement: NIHMS877344-supplement-1.pdf [file NIHMS877344-supplement-1.pdf]

Figure S2

A

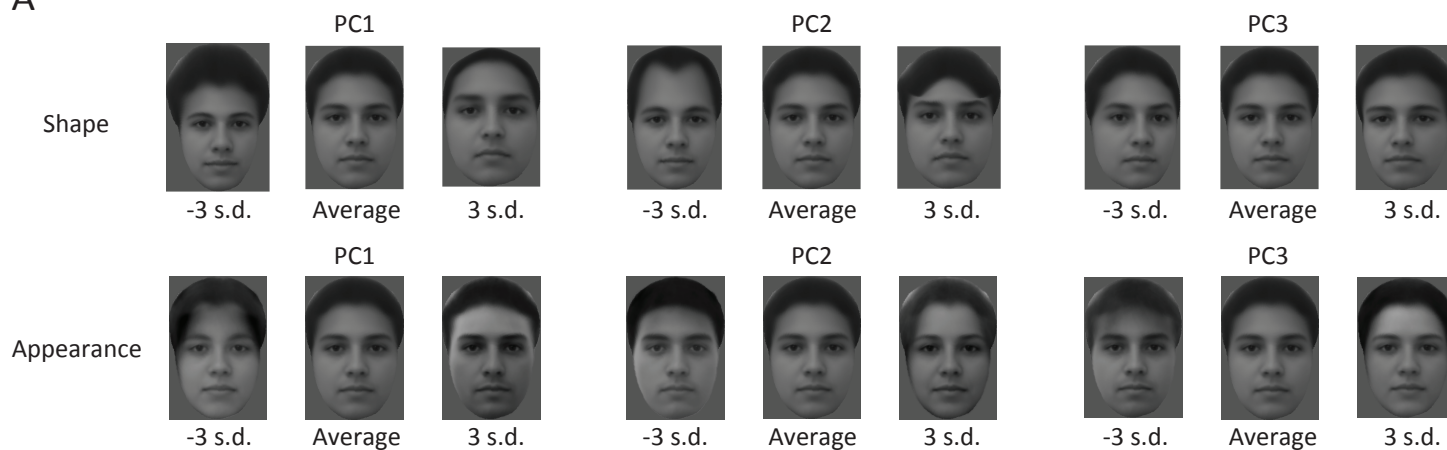

B

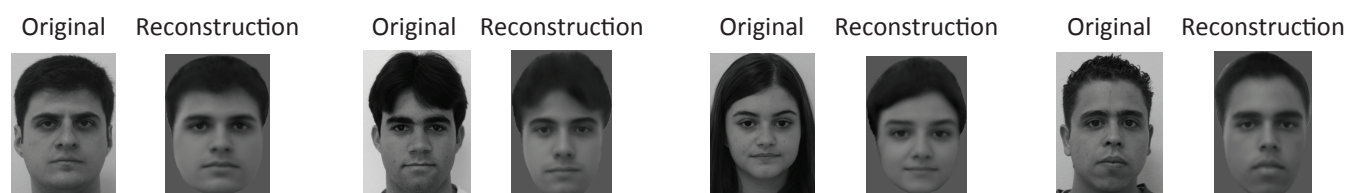

C1

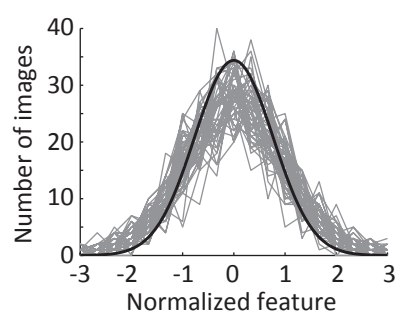

C2

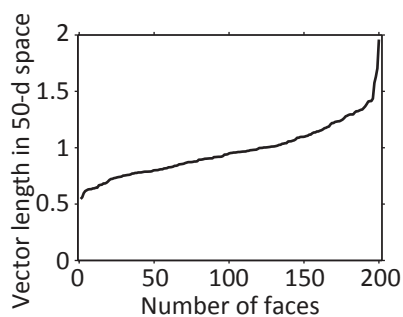

C3

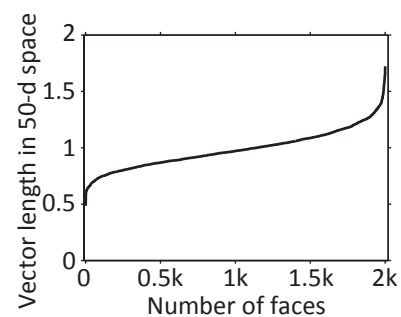

D

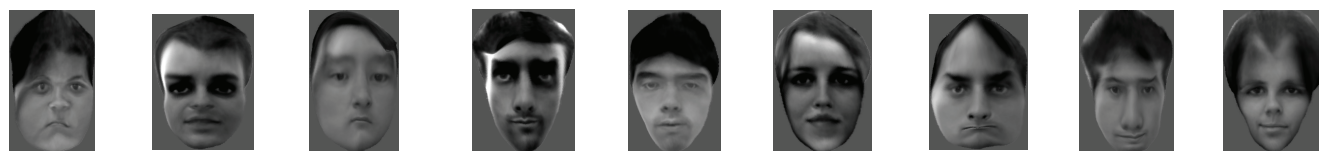

E

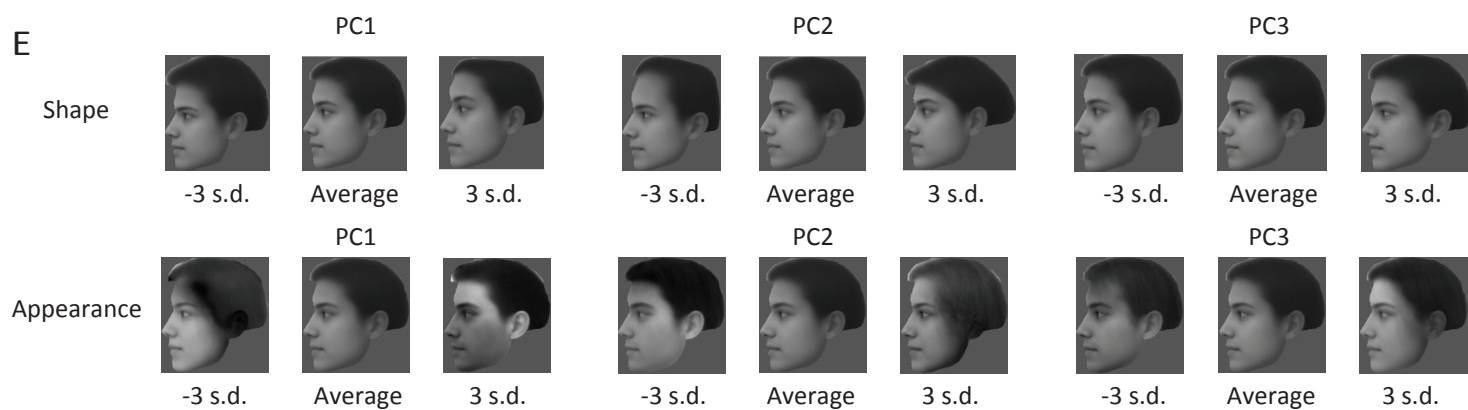

F

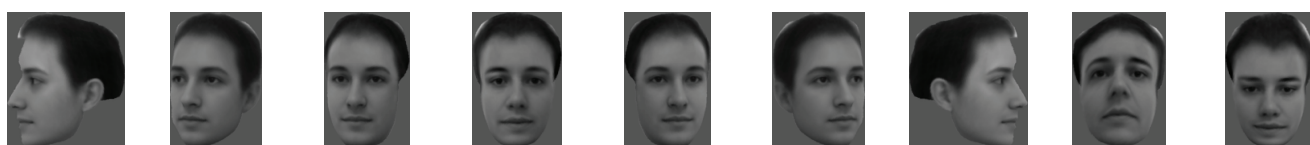

G

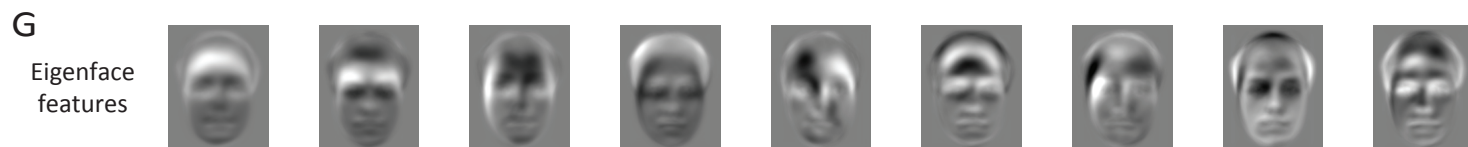

Supplement: NIHMS877344-supplement-2.pdf [file NIHMS877344-supplement-2.pdf]

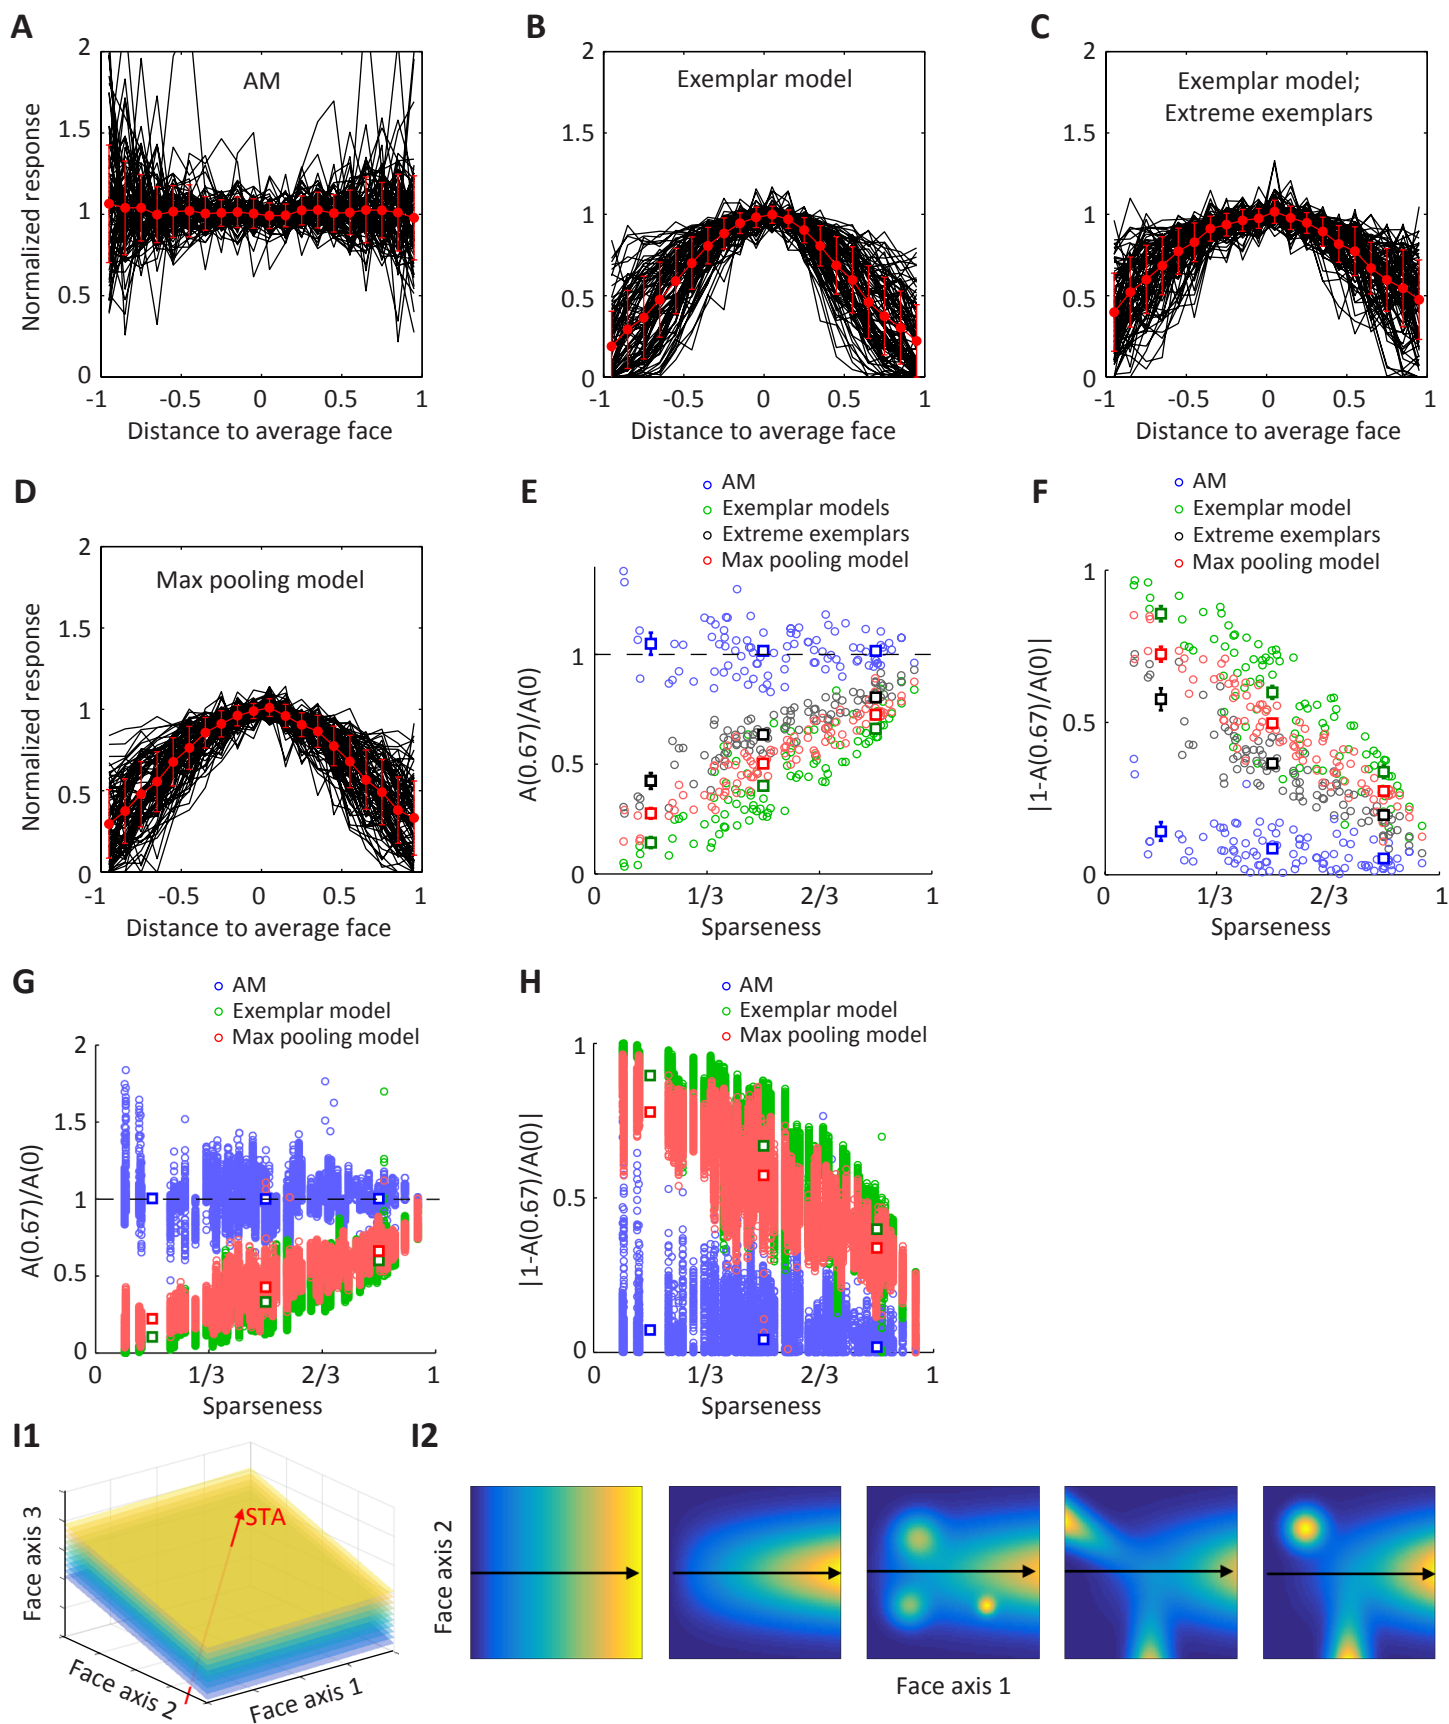

Supplement: NIHMS877344-supplement-3.pdf [file NIHMS877344-supplement-3.pdf]

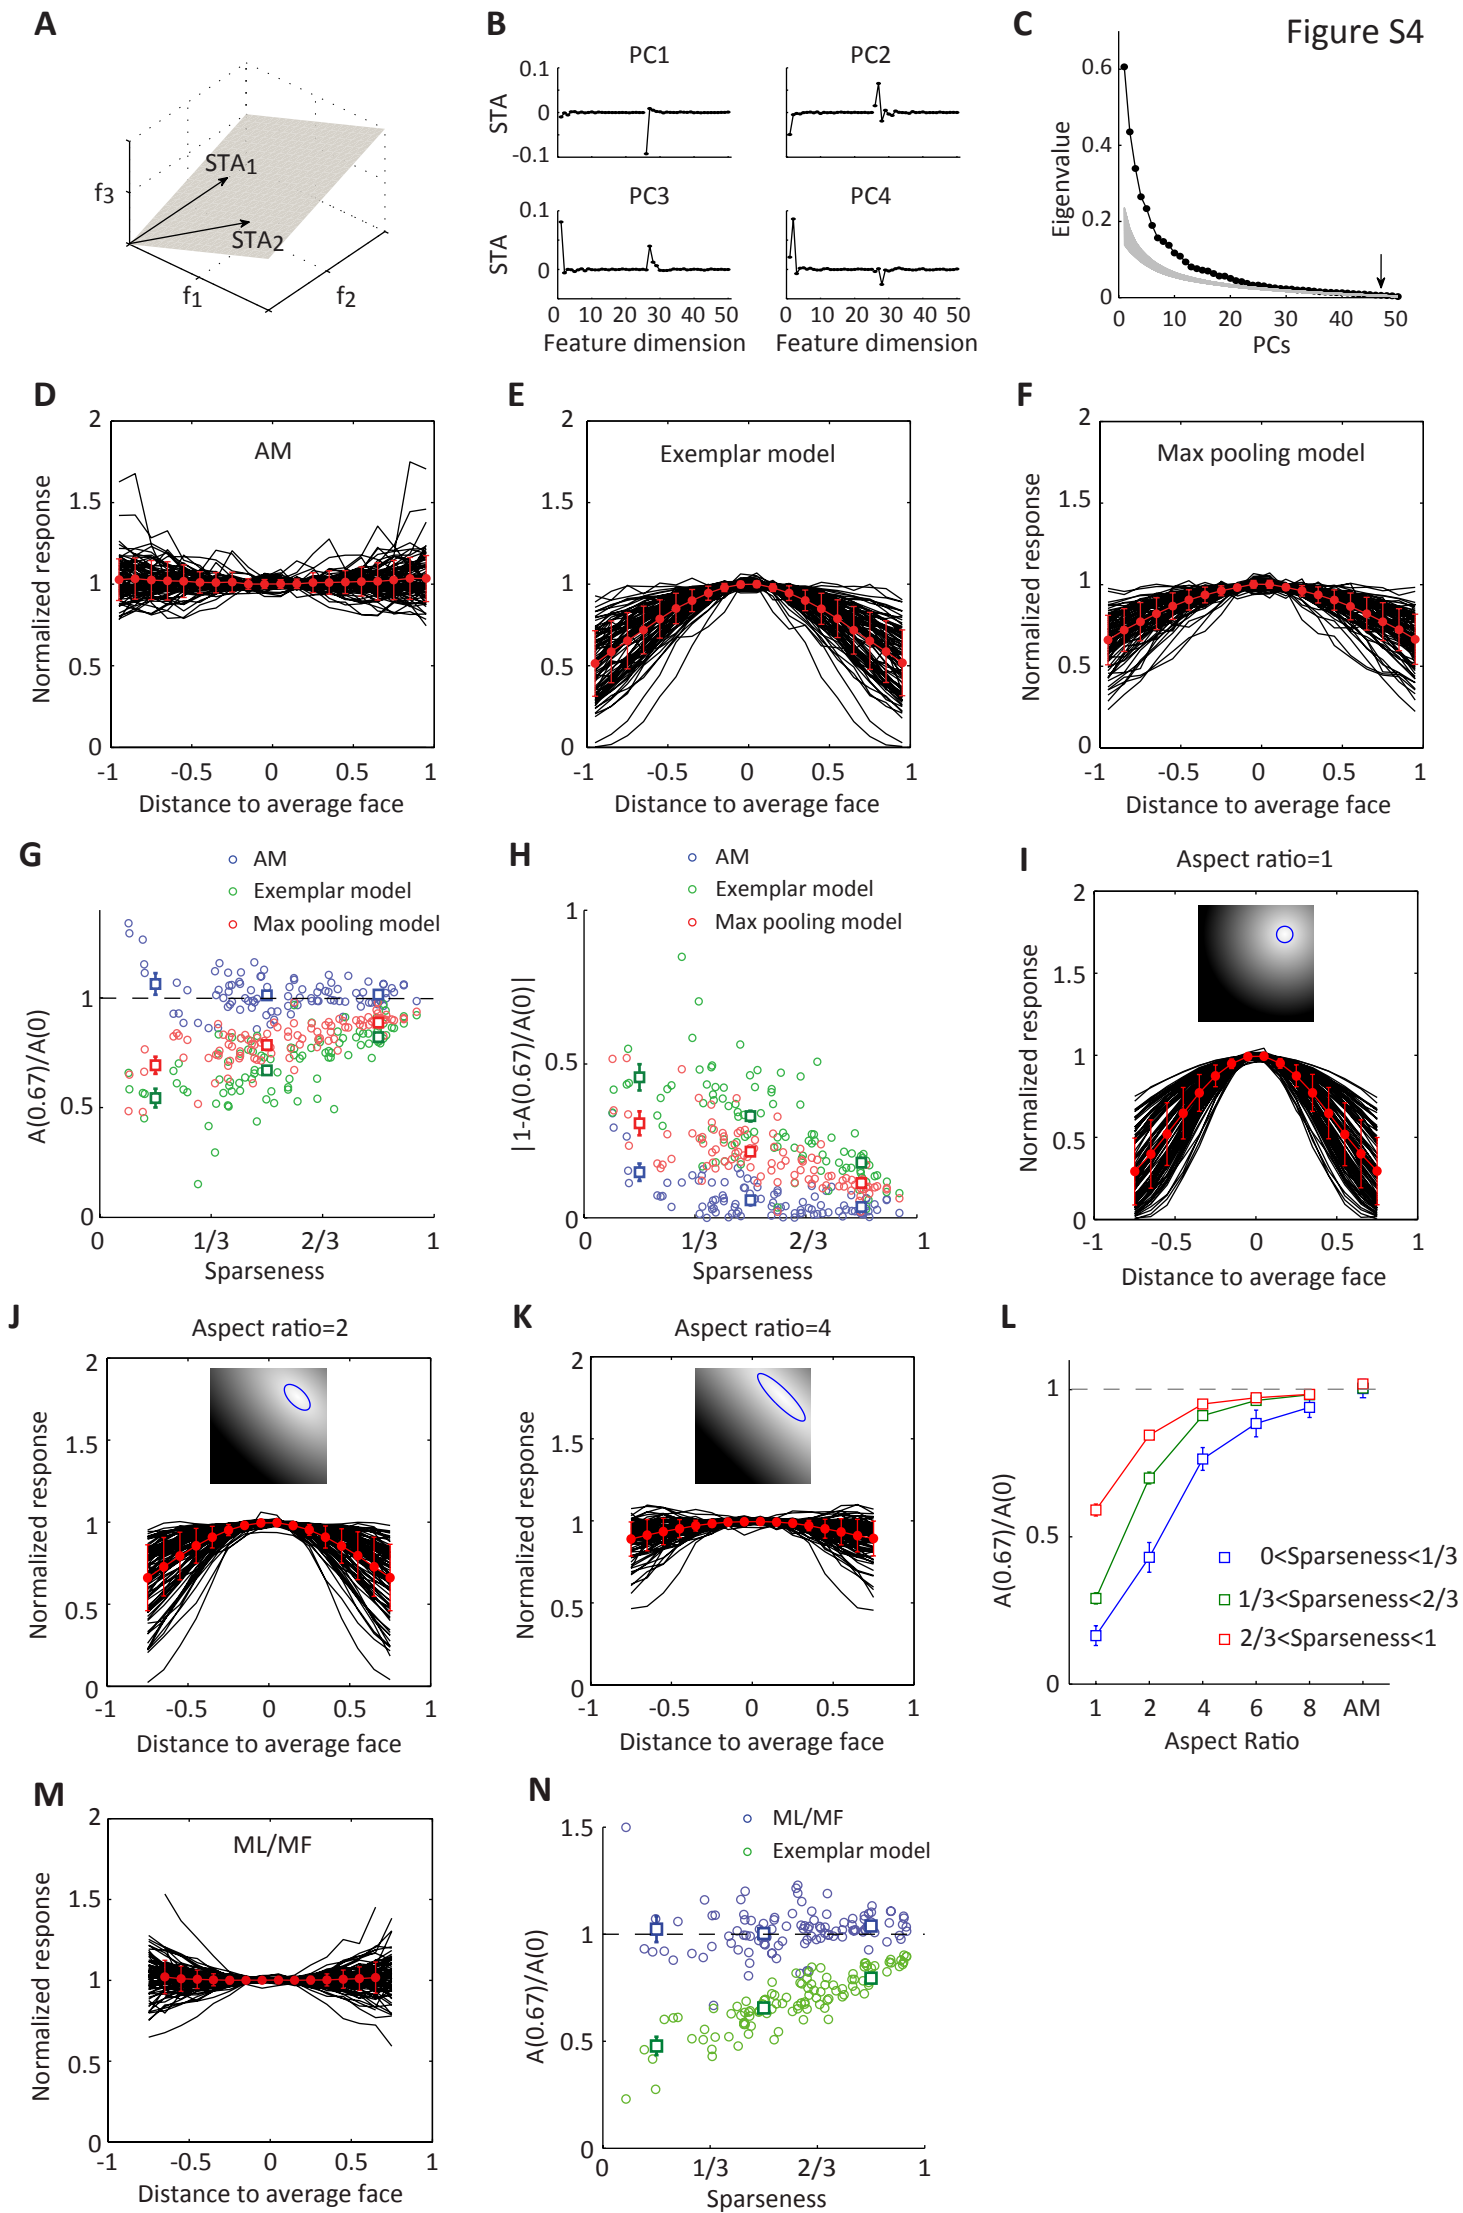

Supplement: NIHMS877344-supplement-4.pdf [file NIHMS877344-supplement-4.pdf]

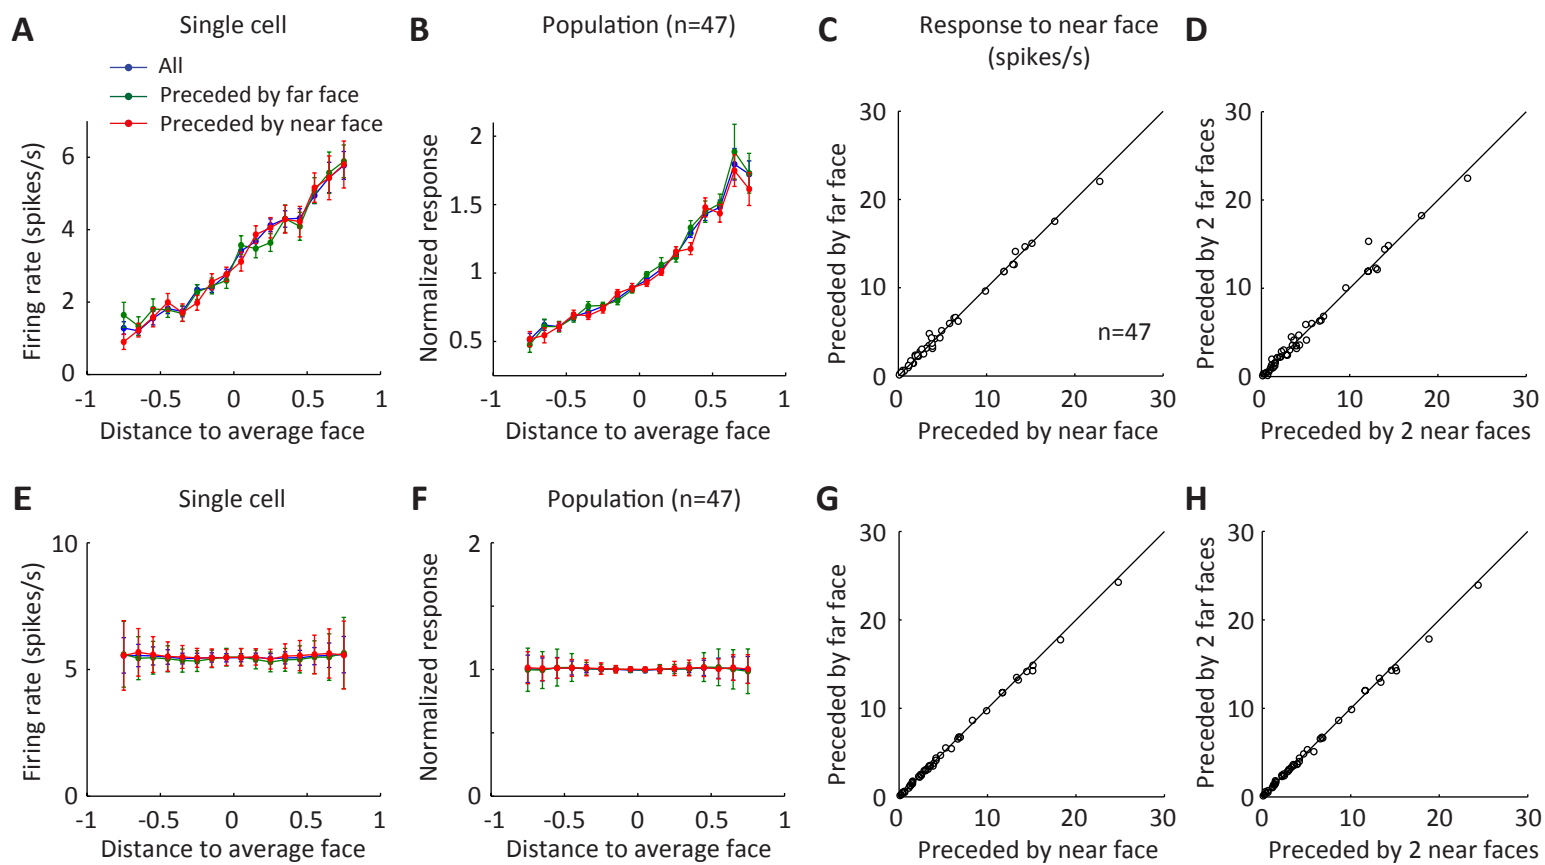

Supplement: NIHMS877344-supplement-5.pdf [file NIHMS877344-supplement-5.pdf]

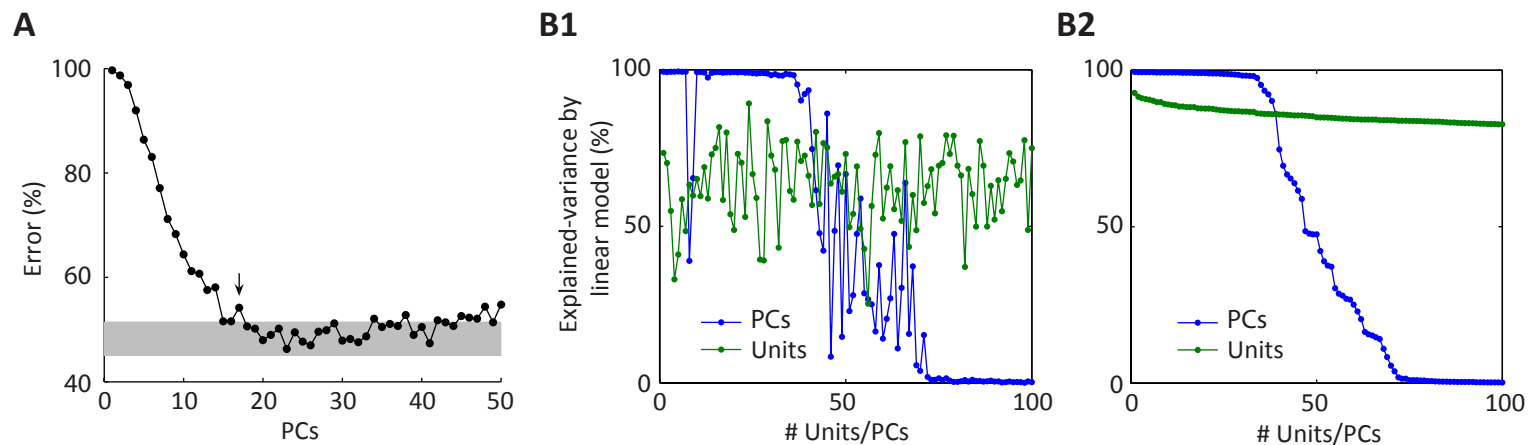

Supplement: NIHMS877344-supplement-6.pdf [file NIHMS877344-supplement-6.pdf]

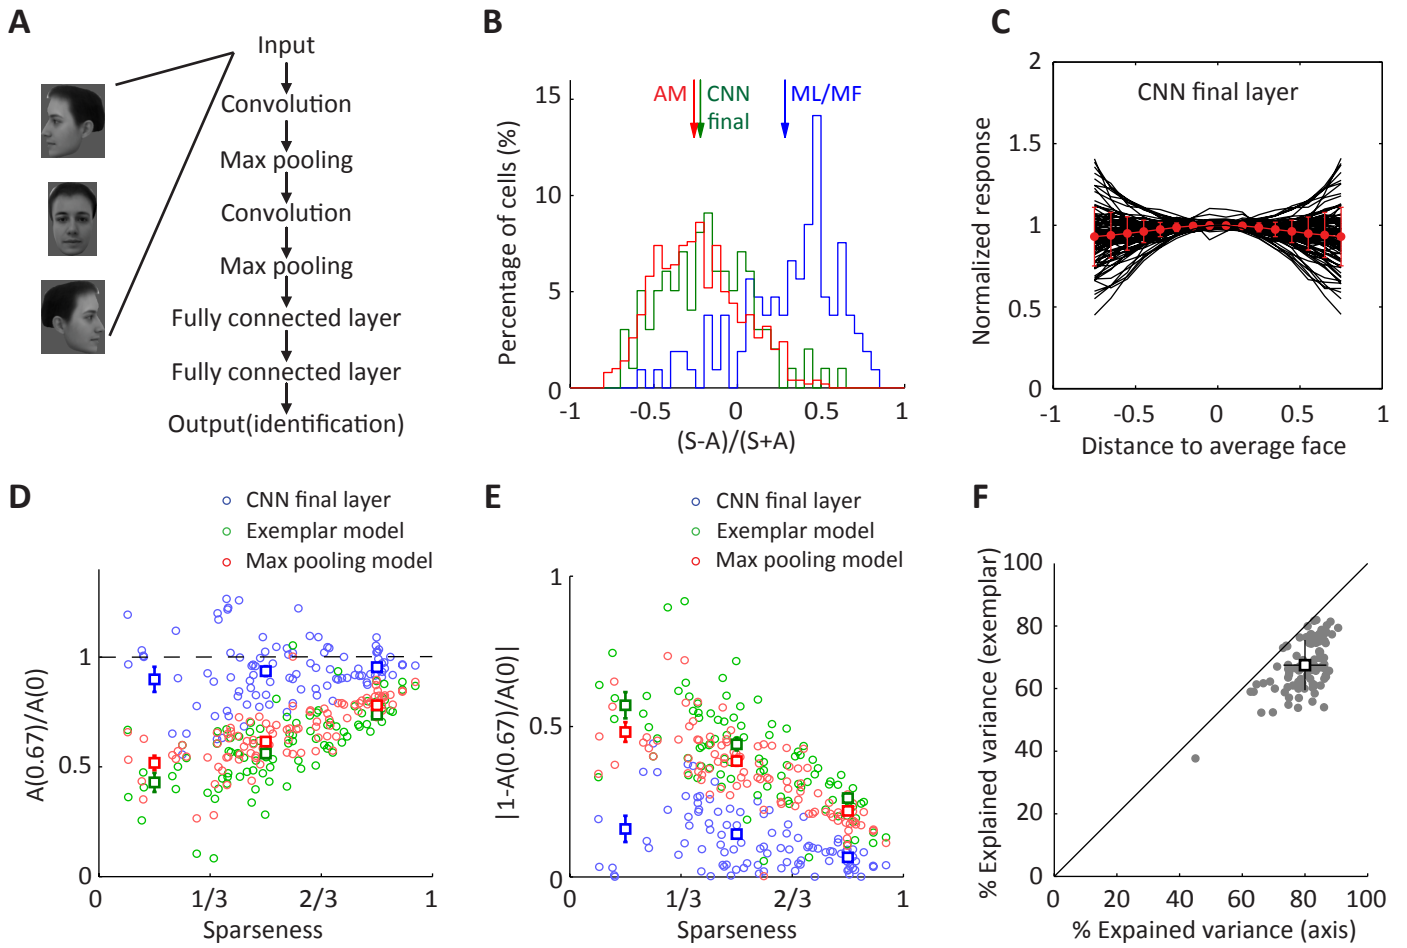

Supplement: NIHMS877344-supplement-7.pdf [file NIHMS877344-supplement-7.pdf]
